# Supplementary material
Source: PubMed Central journal article supplement (PMC3648052)
Supplement: AEM.00225-13_zam999104394so1.pdf [file AEM.00225-13_zam999104394so1.pdf]

**Supplemental Table S1. Primers and probes used in this study**

| Serogroup | Target gene | Forward reverse primers (5'-3')                                          | Product size (bp) | Primer conc'n (μM) | Probe sequences (5'-3')                                                                                           |
|-----------|-------------|--------------------------------------------------------------------------|-------------------|--------------------|-------------------------------------------------------------------------------------------------------------------|
| Group A   |             |                                                                          |                   |                    |                                                                                                                   |
| F(O11)    | wzy         | WI-14808: CAATCGCCAGAGGCATAA<br>WI-14809: AAAGAGAGAGCTTCGGATGTACG        | 1036              | 0.1                | OA_2795: AGAAATATCTCGGTAGGTTTTGT<br>OA_2796: ATTTACATGGGCTCGACTTTATATT<br>OA_2797: CATCGTTATCTTTGATGCTTACTTA      |
| G(O13)    | wzx         | WI-14810: GTGGGGTTTTTTGGCAGGGAGC<br>WI-14811: TAATCCCAACTTAGTTGTATCGCC   | 830               | 0.08               | OA_2798: GTTATGACTATGCAATTTGGTCTTG<br>OA_2799: AAATATCCTTAGGGATTCTGTTAGG<br>OA_2800: ATTGCTATGATTGAGTTTATCTGTA    |
| H(O6,14)  | wzy         | WI-14816: CGTTTATCCAACCTCTTTTATGCG<br>WI-14817: ATCCCAACTCCCTATTGTCCAC   | 537               | 0.08               | OA -2801: TTGGTGGTATGCAGAATTTATTTAG<br>OA-2802: AGAAGGCTACCAGATTAATTTTGTA<br>OA-2803: AGCTTCAGATTTAATTATAGGGATA   |
| I(O16)    | wzx         | WI-14818: CATATCTTGTTAGAGTTCTTGAGCC<br>WI-14819: ATACAGCTTGCGTGACAGGACC  | 719               | 0.1                | OA -2804: TAGCTTTACAAGGTATTATTGGTCC<br>OA -2805: GGCTATTTTATAGCTGCAGATAAAA<br>OA -2806: TAATATTAGGGATATTTACAGGGCC |
| J(O17)    | wzy         | WI-14824: GCCTTGGTTCAGTTTGTAAGTTGG<br>WI-14825: AATACCCAACCATTCATTGCCAA  | 502               | 0.08               | OA -2809: ATTTTAGTGAGAATGGATACTTTGC<br>OA -3200: AATATCAATTTATAAGCTTTTGGCT<br>OA -3201: TTTCCCGAAATAATTGACTCTATTT |
| K(O18)    | wzx         | WI-14826: TGA CTGGCTATTGTTTCACAGAGAG<br>WI-14827: CGTACACAGCGAGACTTTGCGG | 444               | 0.08               | OA -2812: GCCGCTATTGTAATTATTTATAGTC<br>OA -2813: TGCGCTAATTAAGAAAATAGATTC<br>OA -2814: TATTGCTGGGTTGTCTTTATCTTAT  |
| L(O21)    | wzx         | WI-14830: CTATTTCCAAGGATGGGACTACCG<br>WI-14831: CTAAAAACCCCGTAGCGGCTCG   | 578               | 0.1                | OA -2815: TTCTATTTGCGATAAATGTATCCGA<br>OA -2816: ATTATCATACCCGGTTTTAGTTCAT                                        |

---

|         |     |                                                                            |     |      |                                                                                                                                                        |
|---------|-----|----------------------------------------------------------------------------|-----|------|--------------------------------------------------------------------------------------------------------------------------------------------------------|
| M(O28)  | wzy | WI-14836: GATTTTACTCCTTCTGCGTTGTCTC<br>WI-14837: CTTCCGAATATTGCTTTAGCCTCC  | 740 | 0.08 | OA -2817: CAATAAAAGATTGCAAGGAAAGAAT<br>OA -2818: CTATTCTCAATAGGACTTTTGTTC<br>OA -2819: AGATGATGGTATGTACTGGGTATAT<br>OA-2820: AATAAAGAACTATACGCCTATTGGG |
| N(O30)  | wzx | WI-14840: CCTATTTTTGATGCGGACCCTGG<br>WI-14841: AATAAACTACCAATGACTCCCCC     | 323 | 0.08 | OA -2822: ATTTTGGTAATATAGTAACCTTCAC<br>OA -2823: TAACCTTCACTTTATTGTTACTCCT<br>OA -2824: TTAACAATTGCTCTATTGGCTATC                                       |
| O(O35)  | wzy | WI-14844: TGTGTTTACTCCTTTGCTTGGTCAT<br>WI-14845: CTGCCTTGGAGGTTGATCATTGAC  | 278 | 0.08 | OA -2825: ATTGCATTATTGTTCTTCAATTCCA<br>OA -2826: AATTATGCTTGTGGATCATTATTGC<br>OA -2827: CTTAATGAGCAAGGTTTGATAGATG                                      |
| P(O38)  | wzy | WI-14848: CCCGCATTCCAGTATGGTGTCG<br>WI-14849: CAACCTAATAATGCTGAACGATG      | 426 | 0.08 | OA -2829: TAATAAGGGCTTCGTTTGCTATATA<br>OA -2830: ATAATAATGCCAATGTGCTAGATAC<br>OA -3097: TGACAAATTTATTACACTCAGAT                                        |
| Q(O39)  | wzy | WI-14852: TATGGATTGTATAGTAATAGCGGGC<br>WI-14853: TGATTTGAAGACAGATAAAGCGCG  | 255 | 0.08 | OA -3102: TATGGTCTCCTGAACTAGATAATGT<br>OA -3103: TTATTTAATTTTTACAAAGTAGCCG<br>OA -3104: AAACTTTAAATTAGCATTGAAGATG                                      |
| R(O40)  | wzy | WI-14856: TTGATTGCTGCTTTTAGTGCCATG<br>WI-14857: TAAATTGCATGAGTGGATTATCGCC  | 232 | 0.08 | OA -3107: TATAAGTGAATTTGTTTCAATGTGG<br>OA -3108: GAGAAGAAAGTAAGCAATATTAGCT<br>OA -3109: GTAGCTTTATTGCTCTTATTGAAGG                                      |
| S(O41)  | wzy | WI-14860: ATAGTTTGCTACTTCGTGTTTCTCG<br>WI-14861: GTATAAGAAGGAAGCTTGTCCACCC | 364 | 0.07 | OA -2831: CAAAGGCGATATTCTATTTACAACA<br>OA -2832: ACTTCGATTTACAGTCCTTTATTTT<br>OA -2833: AAAGTAACTACTAATGCTAACGAAA                                      |
| Group B |     |                                                                            |     |      |                                                                                                                                                        |
| T(O42)  | wzy | WI-20732: CTTTAGGTATAGCAGGCTTTCGATG<br>WI-20733: TAAAGCGATGCACTGAGATTAGCCA | 608 | 0.08 | OA -2835: TTTCTAGCGTAGTACTTTTATCTGC<br>OA -2836: TTGTTACTATGGCGATACTAATACC<br>OA -2837: TGGTATCTGTTTAAATCCTTTCTCT                                      |

---

|        |     |                                                                            |     |      |                                                                                                                   |
|--------|-----|----------------------------------------------------------------------------|-----|------|-------------------------------------------------------------------------------------------------------------------|
| U(O43) | wzx | WI-14866: CCAAATGGAGTTACGGCAAGC<br>WI-14867: AAGAATCAAATCCCCTGGGTAGA       | 826 | 0.10 | OA -2838: CTCTAAAATTCTTATCTACCCAGGG<br>OA -2839: TTGCTCTTCTATTAATCTCTTGGTT<br>OA -2840: ATTTGTATCTTCCCTCAACAAATC  |
| V(O44) | wzx | WI-14870: CAGAGATCACTATTCCTGCGCT<br>WI-14871: GCAGCATTACTATAACCACTACC      | 778 | 0.08 | OA -2842: TGGCCGTCATTAATATTAATGTATG<br>OA -2843: GATATATGGGATTGCAATCCAATTG<br>OA -2844: AATTTAGTGTATTTGATGTTTGGCC |
| W(O45) | wzy | WI-14876: CCTTGACCCATCAGGAGTCTAT<br>WI-14877: CCTTCGAGAATAACGTCCTGGC       | 683 | 0.10 | OA -2845: TAATTATAATGTGCCAGGACGTTAT<br>OA -2846: AATATATACTTGGATAGTGCCAGAG<br>OA -2848: TTAACTCACCAGGTATCAGTAATTC |
| X(O47) | wzy | WI-20736: TGCTTATTCCTTGTCTTATGGGTTC<br>WI-20737: AGGACAAAGGATAGCGCATCAGTG  | 793 | 0.07 | OA -2849: TATATATTCGCCAGATTCAGTATG<br>OA -2850: TTATGTAACATCAGCCTTAAACAGA<br>OA -2851: ATATTGGCAATAATTAGCAGATGTG  |
| Y(O48) | wzx | WI-14882: GCTTCAGATTTGGGATTGTATGG<br>WI-14883: TGGCGCAGATAAATCTGATACCTTT   | 545 | 0.1  | OA -2852: GTGTGCTCGGAATTCTTTATATTTT<br>OA -2854: TTGCAAGTTTTATTCTCTTCGTAAG<br>OA -2855: ATTAATCACAATTGAGAGTCAAACG |
| Z(O50) | wzy | WI-14888: TACGTGTGGAGGACTATCATTTC<br>WI-14889: CGCTAAAACATATAGCACTCCCTA    | 491 | 0.08 | OA -2856: ACTTTAGGGAGTGCTATAGTTTTAG<br>OA -2857: TATTATCGATTGCGCTTATCAAAA<br>OA -2858: TATGGTTAAGGTTGATAAGAAAAGT  |
| O51    | wzx | WI-20742: ATGGGTTATTACCTCGACTAACATC<br>WI-20743: CGCAAATGATAAGCACAGAAACAAG | 710 | 0.03 | OA -2859: ATTATTGCTTGTCTTCTGTGCTTATC<br>OA -2860: CAAATAAAATTGCCACAGCTATTTT<br>OA -2861: TATAATACCGACTTGAAAACTAGG |
| O52    | wzx | WI-14894: ATACTTGGCTGCCTATGCTCTTA<br>WI-14895: GCGGTGCGCTAATTACTGAGAAA     | 382 | 0.13 | OA -2862: TATCAATTTTCTCAGTAATTAGCGC<br>OA -2863: ATTTCTTTGCAATGGTGTATTTACC<br>OA -2865: ATAAGAGGTGTTATAGCAGGTAATT |
| O53    | wzx | WI-14898: GGCGAAACTGATTATTGTTCTTAC<br>WI-14899: AGCAGCCCTTGCATAGCTCCTC     | 332 | 0.10 | OA -2866: AATACTATTAGAGGAGCTATGCAAG<br>OA -2867: TATACAACGAGTACCACAATTATTC                                        |

---

|         |             |                                                                            |      |      |                                                                                                                                                          |
|---------|-------------|----------------------------------------------------------------------------|------|------|----------------------------------------------------------------------------------------------------------------------------------------------------------|
| O54     | <i>wbbE</i> | WI-14904: CCATGAAACCATCGGAGGTATTGA<br>WI-14905: TAAATTCTCGCACCCATGCCCCC    | 265  | 0.06 | OA -3099: GTAGGTTATTATAACACGGCTAATA<br>OA -3197: TCTGTGATAGTCATGAAGTAAAGCA<br>OA -3198: ACTATAGAAGGCGAGTTTGAACGTG<br>OA -3199: TGGTATTCAGTACGCTCTGCGCAAG |
| O55     | <i>wzx</i>  | WI-14908: TGAACCGCTGTTTCTTGCTGGAT<br>WI-14909: GAATAACGGCAGGAATTACCACAA    | 205  | 0.10 | OA -2872: TAATTCCTGCCGTTATTCTATGTAA<br>OA -2873: AGGCAATTTATAGCATGTCTTATTG<br>OA -2874: TGGATTAATATTGGCATGTGGATAT                                        |
| O57     | <i>wzx</i>  | WI-20750: ATAGGCTATCTTAATTTGGCGGAAC<br>WI-20751: CTATGGATGCACCTAACGGAGCTAC | 721  | 0.06 | OA -2878: TTGCTTTTAGCATTTTAATCCTAGG<br>OA -2880: TTCAAAATTACATGGGAAGTCTATT<br>OA -2881: GCAGTAGCCATTATTCTATCTACAA                                        |
| Group C |             |                                                                            |      |      |                                                                                                                                                          |
| O58     | <i>wzx</i>  | WI-14918: GATAGTGGTTTTAGCTCCGCTCTG<br>WI-14919: TCTCTCTCGAAAGCAAAAGCCAAC   | 1132 | 0.13 | OA -2882: ATTTCCAATTTGGTTAATAGCATCT<br>OA -2883: AATAATGACAATTCCATTTGGTGTC<br>OA -2884: ATAATTGCAAAACCTTTTGTGTTC                                         |
| O59     | <i>wzx</i>  | WI-14922: GTGCTCAGATAGGATTGCTTACTTC<br>WI-14923: CAAGCGAGACTGTTTTTCCCATCC  | 1008 | 0.08 | OA -2886: CTTCAAGTGCATTTGTATCCATATG<br>OA -2887: CTCATATAGGCGCGAAACTATATAC<br>OA -2888: TAGGTTTTATTATCTCAGCTATAGC                                        |
| O60     | <i>wzx</i>  | WI-14926: GATGCTCACCTTGTTGCGGATG<br>WI-14927: GACTTTCGCAACACTCTTGATTTCG    | 868  | 0.12 | OA -3024: AACCATGGCTAAAATTTAAATATTG<br>OA -3011: TATATTTTGATGGCATTAAACAAGCG<br>OA -3012: TTAAATATTGGATCGGGAAAATTGA                                       |
| O61     | <i>wzx</i>  | WI-14930: GACTGAGTTTTGGTTTATTGCGTTG<br>WI-14931: ATAACCCAAGATGAGGGATAAGGC  | 725  | 0.13 | OA -3014: ATATTTCTTTGTATCTGTTGTTGGC<br>OA -3015: CAATTGTTATTTCTTTTCGCTTTTCC<br>OA -3016: ATACGAGGAATCTTTACCTTTGATC                                       |
| O62     | <i>wzx</i>  | WI-14934: GGTTTGTTAGTGCCAATCTTATGC<br>WI-14935: AGACTCAATCCTATTAACCACCCAC  | 656  | 0.05 | OA -3018: TATATTTGTTTCCATATATGGGCCT<br>OA -3019: TATGTTTGGAAAGTGAAAATGGAAAT<br>OA -3020: AATAATCAATCCACTGCCTATTTTG                                       |

---

|         |     |                                                                                  |     |      |                                                                                                                                                     |
|---------|-----|----------------------------------------------------------------------------------|-----|------|-----------------------------------------------------------------------------------------------------------------------------------------------------|
| O63     | wzx | WI-14938: GAATGTTCTCAATGGTGGAAAGGG<br>WI-14939: TCCATACTGCTTGCCATTGCC            | 553 | 0.05 | OA -3021: TTAATAAAAATTGGCTGGGATAGGAT<br>OA -3022: CTATACAAAATGGTGTTATAGGTGC<br>OA -3023: TGATAATGTCATGTGTAATGATGGT                                  |
| O65     | wzy | WI-14942: AGTTTCCTTATTTTTGGAGTCGGG<br>WI-14943: GTTCCACTTCTTCTGAAGGACCTC         | 413 | 0.05 | OA -3025: ATAAGCTCGTTAATATGTCTTCTAT<br>OA -3026: CTTAATGTGCAGATGAACATTACTG<br>OA -3027: TATCTACGCTATAATTATGCCAGTG                                   |
| O66     | wzx | WI-14946: CAATGAGCCTTTCGGTGCATAAC<br>WI-14947: AATAAACTGAACAGCAACGCCATAC         | 382 | 0.05 | OA -3029: CTTATGAGACGTTAGCTATGTATGG<br>OA -3030: TATGGGTCCCTCTAATTAGTATGAT<br>OA -3031: TATCACTAGCATTGCGTACAATATT:                                  |
| Group D |     |                                                                                  |     |      |                                                                                                                                                     |
| BO67    | wzx | WI-14954: ATTACAGGACAAAACCAGAATGCTC<br>WI-14955: TGAGCCAAGCAAAATATTGACACC        | 571 | 0.08 | OA -2782: ATACTGCTATTTTGCAAGCATTATG<br>OA -2783: TATATGTGCTGAATTGAGAGTCAAA<br>OA -2784: TATATGGTCATTTCTCAAAGGCTAA                                   |
| AD1     | prt | WI-14950: GCATATACTAAACAAAAAGCAAATGAAC<br>WI-14951: TCAGCACAACTATACATCAATTCATTTA | 407 | 0.58 | OA -3118: AACAAAAAGCAAATGAGTTCGCCGC<br>OA -3119: AATTCGTGAATATGTAGAGACTGTT<br>OA -3208: ACAAAAAGCAAATGAGTTCG<br>OA -3122: GCGATATCAATTCGTGAATATGTAG |
| D2      | wzy | WI-14968: TGGTTACATAGCATTCTACATACGC<br>WI-14969: GCCAAAGTCGCTAAAGAAAAATGTG       | 447 | 0.08 | OA -3205: CGTATTATCAAAGTAAGCATTATTT<br>OA -3206: TCGCTATTAATACTTGTTTCTATAT<br>OA -3112: CGAAGAGAAAATTTAATTTTGCTAA                                   |
| D3      | wzy | WI-14952: CTCCCTTGGAGGGGTTGAAGAGA<br>WI-14953: CCCTTGATGTAGCCAATCCAGC            | 676 | 0.08 | OA -2779: ATTCATTATCCGTTCTAATGTTTCA<br>OA -2780: TTCTAAGTCCAATAGTATATGAGTC<br>OA -2781: AATCAAATATCTTTTATGCGGATGC                                   |
| Group E |     |                                                                                  |     |      |                                                                                                                                                     |
| C1      | wzy | WI-14960: CTGATTGGCTCCCTATTACGATG<br>WI-14961: CTGAGAACATGGCTGAGATCGGAG          | 738 | 0.08 | OA -3114: CTTATTCTTATTCTATGTGCGTCGA<br>OA -3115: TATTCCTATCGCGTTAATATTCTGG                                                                          |

---



**Supplemental Table S2. Additional Primers designed for serogroup O28 and O67.**

| Serogroup(serotype) | Target gene | Forward reverse primers (5'-3')                                      | Product size (bp) |
|---------------------|-------------|----------------------------------------------------------------------|-------------------|
| O28(Pomona)         | <i>wzy</i>  | WI-54164: AGCAAAGTGAATTGGGATA<br>WI-54165: CAACCACCATTTTCAACCAT      | 720               |
| O67                 | <i>wejV</i> | WI-55944: CCATAGCCGACTGGATTACTTT<br>WI-55945: CTTATTTTGGCAATCTGACGCT | 309               |
